# Supplementary material for: Life cycle assessment of the production of surface-active alkyl polyglycosides from acid-assisted ball-milled wheat straw compared to the conventional production based on corn-starch
Source: Royal Society of Chemistry journal article supplement (doi:10.1039/c7gc03189k), 2018-01-01
Supplement: c7gc03189k1.pdf [file c7gc03189k1.pdf]

Supplementary Information for :

**Life cycle assessment of the production of alkyl polyglycoside from ball-milled wheat straw compared to the conventional production based on corn-starch**

Table S1. Foreground data and background data sources for the ball milling process

| Flow/Process        | Quantity                                                              | Ecoinvent process (background data source)                                           |
|---------------------|-----------------------------------------------------------------------|--------------------------------------------------------------------------------------|
| Straw               | 679 kg                                                                | Straw {CH}  wheat production, Swiss integrated production, intensive   Alloc Def     |
| Sulfuric acid       | 67,9 kg                                                               | Sulfuric acid {GLO}  market for   Alloc Def                                          |
| Fatty alcohols      | 490,2 kg                                                              | Fatty alcohol {GLO}  market for   Alloc Def                                          |
| Steam               | 7,3 kg                                                                | Steam, in chemical industry {RER}  production   Alloc Def                            |
| Soda                | 55,4 kg                                                               | Sodium hydroxide, without water, in 50% solution state {GLO}  market for   Alloc Def |
| Electricity         | 35 kWh (grinding)<br>255 kWh (ball milling)<br>34 kWh (glycosylation) | Electricity, medium voltage {FR}  market for   Alloc Def                             |
| Lignin incineration | 115 kg                                                                | Biowaste {GLO}  treatment of biowaste, municipal incineration   Alloc Def            |

Table S2. Foreground data and background data sources for the reference process

| Flow/Process  | Quantity | Ecoinvent or GaBi process (background data source)        |
|---------------|----------|-----------------------------------------------------------|
| Corn starch   | 631 kg   | Maize starch {GLO}  market for   Alloc Def                |
| Fatty alcohol | 426 kg   | Fatty alcohol {GLO}  market for   Alloc Def               |
| Sulfuric acid | 5 kg     | Sulfuric acid {GLO}  market for   Alloc Def               |
| Electricity   | 313 kWh  | Electricity, medium voltage {FR}  market for   Alloc Def  |
| Steam         | 312 kg   | Steam, in chemical industry {RER}  production   Alloc Def |

Table S3. Additional processes used for the sensitivity analysis

| Flow/Process                   | Ecoinvent or GaBi process (background data source)                                     |
|--------------------------------|----------------------------------------------------------------------------------------|
| Fatty alcohol from coconut oil | Fatty alcohol {RER}  production, from coconut oil   Alloc Def                          |
| Fatty alcohol from palm kernel | Fatty alcohol {RER}  production, from palm kernel oil   Alloc Def                      |
| Electricity german mix         | Electricity, medium voltage {DE}  market for   Alloc Def                               |
| Electricity European mix       | Electricity, medium voltage {Europe without Switzerland}  market group for   Alloc Def |

Table S4. Absolute impact results for ball milling and reference processes (ReCiPe2016 Midpoint H) – 1 ton of APG

| <b>Impact category</b>                  | <b>Unit</b>              | <b>Ball milling process</b> | <b>Reference process</b> |
|-----------------------------------------|--------------------------|-----------------------------|--------------------------|
| Global warming                          | kg CO <sub>2</sub> eq    | 1870.856                    | 2240.740                 |
| Stratospheric ozone depletion           | kg CFC11 eq              | 0.005                       | 0.010                    |
| Ionizing radiation                      | kBq Co-60 eq             | 236.455                     | 263.685                  |
| Ozone formation, Human health           | kg NO <sub>x</sub> eq    | 3.803                       | 4.800                    |
| Fine particulate matter formation       | kg PM <sub>2.5</sub> eq  | 2.411                       | 2.748                    |
| Ozone formation, Terrestrial ecosystems | kg NO <sub>x</sub> eq    | 4.138                       | 5.123                    |
| Terrestrial acidification               | kg SO <sub>2</sub> eq    | 8.315                       | 11.786                   |
| Freshwater eutrophication               | kg P eq                  | 0.406                       | 0.554                    |
| Terrestrial ecotoxicity                 | kg 1,4-DCB e             | 0.908                       | 1.333                    |
| Freshwater ecotoxicity                  | kg 1,4-DCB e             | 52.735                      | 62.124                   |
| Marine ecotoxicity                      | kg 1,4-DBC e             | 54.843                      | 69.254                   |
| Human carcinogenic toxicity             | kg 1,4-DBC e             | 42.479                      | 54.840                   |
| Human non-carcinogenic toxicity         | kg 1,4-DBC e             | 41108.948                   | 72891.338                |
| Land use                                | m <sup>2</sup> a crop eq | 1053.839                    | 1945.836                 |
| Mineral resource scarcity               | kg Cu eq                 | 4.563                       | 6.407                    |
| Fossil resource scarcity                | kg oil eq                | 493.554                     | 559.275                  |
| Water consumption                       | m <sup>3</sup>           | 96.307                      | 97.476                   |
